# Supplementary material for: A sea anemone-like CuO/Co3O4 composite: an effective catalyst for electrochemical water splitting
Source: Royal Society of Chemistry journal article supplement (doi:10.1039/c5cc04936a), 2015-01-01
Supplement: c5cc04936a1.pdf [file c5cc04936a1.pdf]

Electronic Supplementary Material (ESI) for Chemical Communications

This journal is © The Royal Society of Chemistry 2015

## Supporting Information for

# A sea anemone-like CuO/Co<sub>3</sub>O<sub>4</sub> composite: an effective catalyst for electrochemical water splitting

Xiumin Li<sup>a</sup>, Guoqing Guan<sup>a,b,\*</sup>, Xiao Du<sup>b,c</sup>, Ji Cao<sup>a</sup>, Xiaogang Hao<sup>c</sup>, Xuli Ma<sup>b,c</sup>, Ajay D Jagadale<sup>b</sup>,

Abuliti Abudula<sup>b</sup>

---

<sup>a</sup>Graduate School of Science and Technology, Hirosaki University, 1-Bunkyocho, Hirosaki 036-8560, Japan.

<sup>b</sup>North Japan Research Institute for Sustainable Energy (NJRISE), Hirosaki University, Matsubara, Aomori 030-0813, Japan. E-mail: [guan@hirosaki-u.ac.jp](mailto:guan@hirosaki-u.ac.jp); Fax: +81-17-735-5411

<sup>c</sup>Department of Chemical Engineering, Taiyuan University of Technology, Taiyuan 030024, China.

### Experimental details

**Chemicals:** Cobalt nitrate (Wako, Japan) and copper nitrate (Wako, Japan) with analytical grade are used as chemicals for the preparation of pure CuO, Co<sub>3</sub>O<sub>4</sub> and CuO/Co<sub>3</sub>O<sub>4</sub> composite catalysts. Potassium hydroxide (Sigma-Aldrich, Japan) is dissolved in deionized water as electrolyte solution for electrochemical characterization of electrodes. Carbon rods (CR, φ 5mm) are provided by C-task company, Japan.

**Preparation of CuO, Co<sub>3</sub>O<sub>4</sub> and CuO/Co<sub>3</sub>O<sub>4</sub> electrodes:** Potentiostat (Princeton Applied Research, VersaSTAT 4, USA) operated with VersaStudio software is applied to controllably deposit Cu/Co(OH)<sub>2</sub> composite and characterize the electrochemical properties of the as-fabricated electrodes. Three electrodes of platinum wire (ALS, Japan), Ag/AgCl/saturated KCl electrode (ALS, Japan) and CR substrate are used as counter electrode, reference electrode and working electrode, respectively. Carbon rods are pretreated in ethanol to facilitate their hydrophilicity at first. Electrolyte solution for Cu/Co(OH)<sub>2</sub> composite precursor is freshly prepared with a composition of Co(NO<sub>3</sub>)<sub>2</sub> and Cu(NO<sub>3</sub>)<sub>2</sub> (concentrations varied as a parameter in this study). For comparison Cu and Co(OH)<sub>2</sub> precursors for pure CuO and Co<sub>3</sub>O<sub>4</sub> electrode are also prepared in 0.05 M

$\text{Cu}(\text{NO}_3)_2$  and 0.1 M  $\text{Co}(\text{NO}_3)_2$  electrolyte solutions, respectively. In this work, the unipolar pulse electrodeposition (UPED) method is used to prepare single as well as composite electrodes. In particular, the potentials applied during the on-time operation range from -0.2 to -1.2 V. On-times of 0.2, 0.5, 1.0, 1.5 and 2.0 s are used, while the off-time is fixed at 1.0 s. The number of pulse cycles to generate the film is varied from 100 to 600. Temperature programmed drying and calcination in air are used in the final preparation step. With a heating rate of 0.5 °C/min, the electrochemically-prepared electrodes are heated to 65 °C and held at this temperature for 5 h and then heated to 110 °C and held at this temperature for another 5 h. Finally, it is heated at a rate of 5 °C/min to 350°C, and held there for 3 h.

*Characterizations:* The electrolysis performance test is carried out using the linear sweep voltammetry (LSV, scan rate: 2 mV/s) in a solution of 1 M KOH. Electrochemical impedance spectroscopy (EIS) is performed within a frequency range of 0.01 Hz–0.1 MHz in 1 M KOH solution. The morphology and element composition are investigated by scanning electron microscopy (SEM, Hitachi, Japan) with an Energy Dispersive X-ray Detector (EDX). TEM images are obtained using a JEM-2100F transmission electron microscope JEOL operating at 200 kV. The crystal structures of the catalyst before and after the calcination are determined by X-ray diffraction (XRD 610, Shimadzu, Japan) with Cu-K $\alpha$  radiation. The Brunauer–Emmett–Teller (BET) surface area is analyzed using adsorption data in a relative pressure range from 0.05 to 0.2 and the pore size distributions of the materials are determined by using the Barrett–Joyner–Halenda (BJH) algorithm according to the desorption data of the N<sub>2</sub> isotherm

### **Optimization of preparation parameters**

In order to prepare  $\text{CuO}/\text{Co}_3\text{O}_4$  composite electrodes with high catalytic performance, the preparation parameters of  $\text{Cu}/\text{Co}(\text{OH})_2$  precursor on the electrode are optimized based on linear sweep voltammetry. Revealed by Fig S1, the concentration of solution for the electro-deposition process has great influence on catalytic performance of composite, and the composite electrode with the highest catalytic performance is obtained in the solution of 0.1 M  $\text{Co}(\text{NO}_3)_2$  and 0.05 M  $\text{Cu}(\text{NO}_3)_2$ .

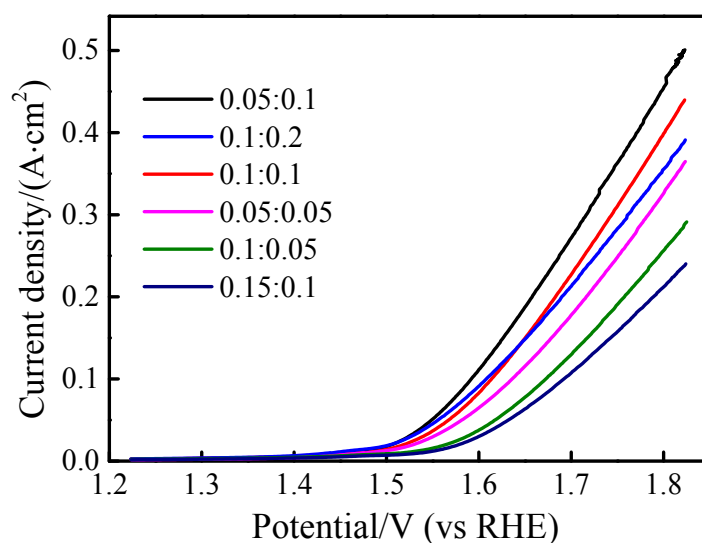

Fig. S1. Polarization curves of CuO/Co<sub>3</sub>O<sub>4</sub> composite catalysts prepared at different concentration ratios (M:M) of Cu(NO<sub>3</sub>)<sub>2</sub> and Co(NO<sub>3</sub>)<sub>2</sub>

Fig. S2 shows the morphology of composite catalysts prepared at different concentration ratios of Cu(NO<sub>3</sub>)<sub>2</sub> and Co(NO<sub>3</sub>)<sub>2</sub>. One can see that CuO pillar@Co<sub>3</sub>O<sub>4</sub> nanosheets core/shell array can be obtained in solution of 0.05 M Cu(NO<sub>3</sub>)<sub>2</sub> and 0.1 M Co(NO<sub>3</sub>)<sub>2</sub> (Fig. S2 A). Benefiting from this smart hybridization structure, the obtained composite electrode showed remarkably enhanced catalytic performances for OER. However when the concentration ratio of Co(NO<sub>3</sub>)<sub>2</sub> and Cu(NO<sub>3</sub>)<sub>2</sub> increases to 0.1 M:0.2 M (Fig S2 B), the surface of electrode is completely covered by Co<sub>3</sub>O<sub>4</sub> nanosheets, and this accumulative structure is not benefit for the electrolyte circulation. Fig. S2 C and D shows the morphologies of composites obtained at concentration ratios of 0.1 M: 0.05M and 0.15 M: 0.1M, due to the high concentration and fast reduction rate of Cu<sup>2+</sup>, the electrode is almost covered by pine needle-like CuO material completely. Moreover, the composite obtained at 0.15 M: 0.1 M has larger particle-size than that from 0.1 M: 0.05M. Because of the low activity of CuO, catalytic performances of composites prepared at these concentration ratios are not good. In contrast, the composite prepared at 0.1M: 0.1M is accumulated by porous ball formed by Co<sub>3</sub>O<sub>4</sub> nanosheet (Fig. S2 E), and shows relatively high catalytic activity due to the enough Co<sub>3</sub>O<sub>4</sub> component per geometric area. As the concentration ratio is decreased to 0.05M: 0.05M, an interesting hybridization structure with a tree-like morphology is obtained (Fig. S2 F), but its catalytic activity is also low due to the accumulative structure.

The formation of CuO/Co<sub>3</sub>O<sub>4</sub> composite with such hierarchical core/shell arrays

should be attributed to the faster reaction rate of  $\text{Cu}^{2+}$  reduction than  $\text{Co}^{2+}$ , Cu nuclei could be formed at first and then grows as nanopillar during the electrodeposition process of Cu/ $\text{Co}(\text{OH})_2$  precursor. Generally, the charge applied on the substrate will concentrate on the embossment parts with higher curvature (refer website: <http://library.automationdirect.com/corona-discharge-and-high-voltage-leaks-issue-12-2008/>; refer paper: H S Fricker, Physics Education. 1989, 24, 157, doi:10.1088/0031-9120/24/3/309). Thus, there should have higher partial voltage on the first-formed Cu pillar on the substrate in the following deposition process, as a result,  $\text{Co}(\text{OH})_2$  nanosheets become easier to deposit around Cu pillars at higher potential, which will hinder the lateral growth of Cu pillars. Consequently, with the deposition proceeded,  $\text{Co}(\text{OH})_2$  nanosheet shell is gradually formed on the Cu pillars and finally a novel hierarchical core/shell structure is obtained.

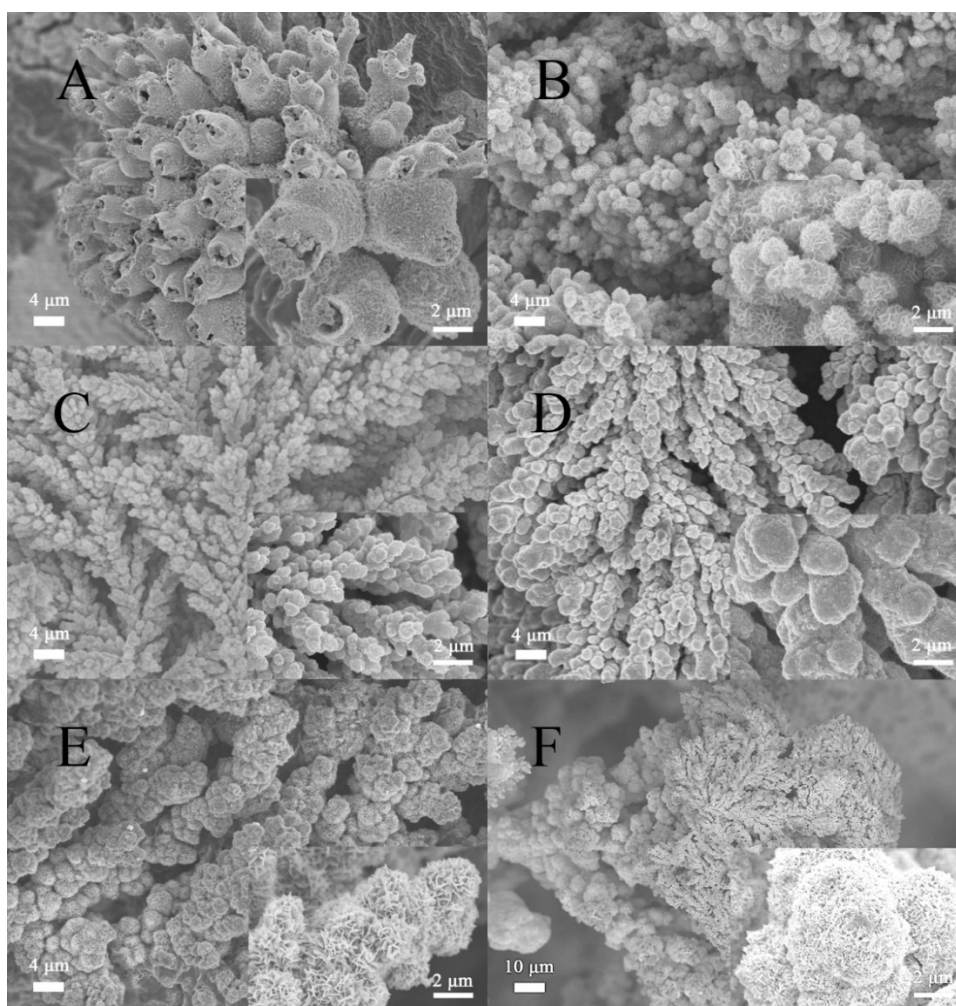

Fig. S2 SEM images of  $\text{CuO}/\text{Co}_3\text{O}_4$  composite catalysts obtained at different concentration ratios (M:M) of  $\text{Cu}(\text{NO}_3)_2$  and  $\text{Co}(\text{NO}_3)_2$  (A: 0.05 :0.1, B: 0.1 :0.2, C: 0.1 :0.1, D: 0.05 :0.05 , G: 0.1 :0.05, H: 0.15 :0.1). Insets show enlarged images.

Pulse cycle times are correlated with the effective component amount and the pulse duration will influence microstructure of electrodes. In this study, with the increase in pulse cycle times, more active component can be deposited on the surface of carbon rod; however if too many pulse cycle times are used, an accumulative structure will be formed. Here, CuO/Co<sub>3</sub>O<sub>4</sub> composite catalyst prepared at pulse cycles, pulse duration of 500, 1.0 s respectively shows the highest catalytic activity (Fig. S3), which should be owed to the smaller particles which can provide more active components in this material.

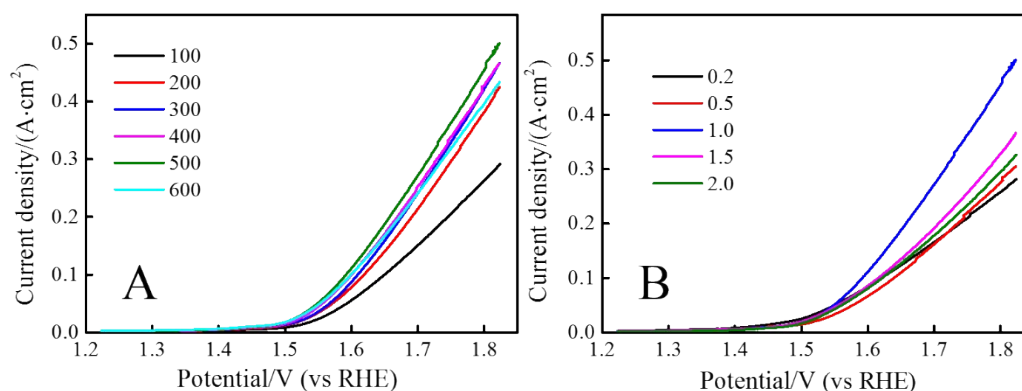

Fig. S3 Polarization curves of CuO/Co<sub>3</sub>O<sub>4</sub> composite catalyst prepared at different pulse cycle times (A) and pulse duration (B).

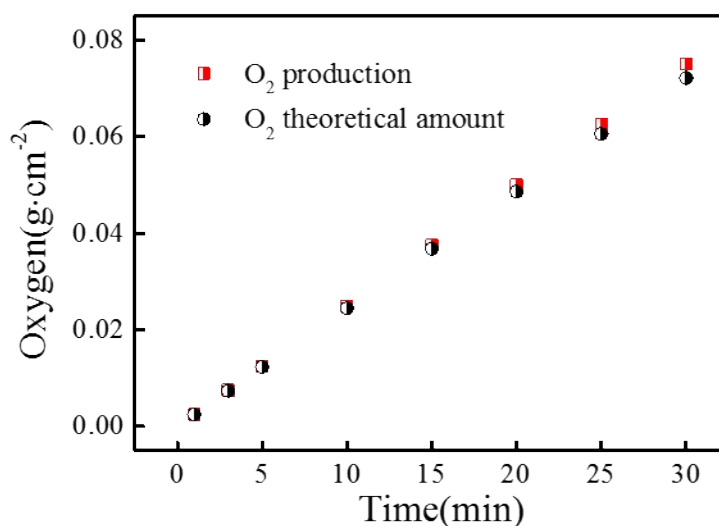

Fig. S4. Theoretical amount of oxygen produced and real oxygen production during the course of electrolysis by CuO/Co<sub>3</sub>O<sub>4</sub> composite electrode. Applied potential is 0.8V vs Ag/AgCl.

As shown in Fig. S4, the oxygen concentration increases linearly along with the proceeding of electrolysis. Theoretical amount of oxygen can be calculated according to the recorded passed charge using Faraday's law:

$$m = \frac{MQ}{nF}$$

Where “m” is the mass of reactant, “M/n” is chemical equivalent, “Q” is electric quantity applied on electrode, “F” is faraday constant. Divided the experimental recorded oxygen amount by theoretical calculated oxygen amount, Faraday efficiency of CuO/Co<sub>3</sub>O<sub>4</sub> composite electrocatalyst is calculated to be about 95%. It suggests that the electrical energy can be efficiently utilized and converted to chemical energy with the as-prepared electrocatalyst.

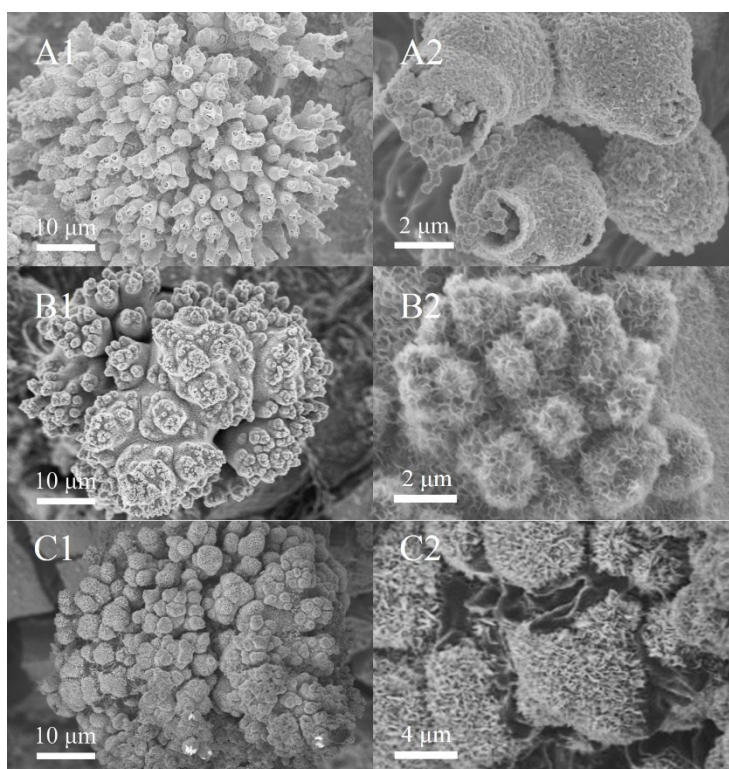

Fig. S5 SEM images of CuO/Co<sub>3</sub>O<sub>4</sub> composite catalysts obtained at different potentials (A1: -0.8V, B1: -1.0V, C1: -1.2V). A2, B2, C2 show the corresponding enlarged images.



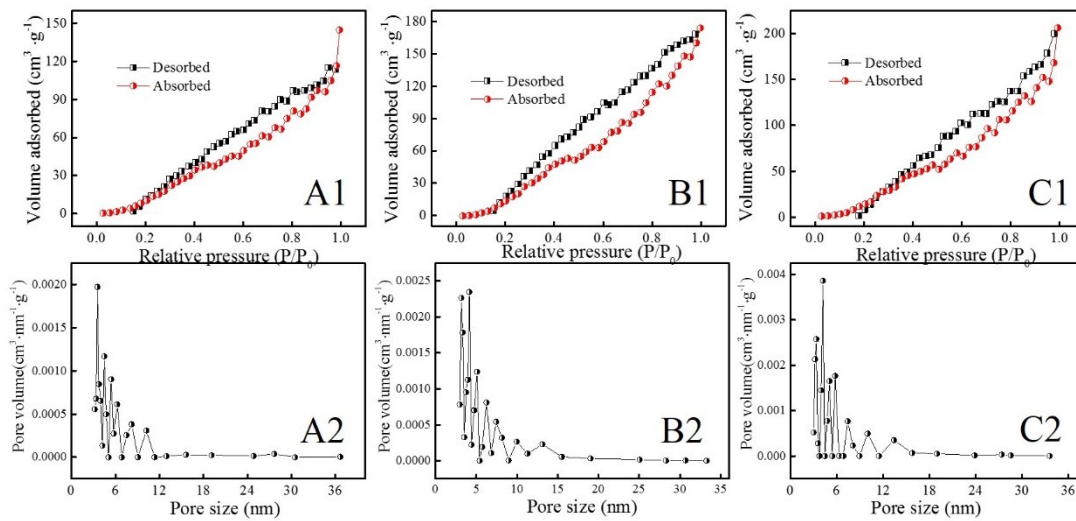

Fig. S6. Nitrogen adsorption/desorption isotherms of pure CuO (A1), Co<sub>3</sub>O<sub>4</sub>(B1) and CuO/Co<sub>3</sub>O<sub>4</sub>(C1) composite catalysts, A2-C2 show the corresponding pore size distributions curves

The Brunauer–Emmett–Teller (BET) method with N<sub>2</sub> adsorption is applied to investigate the surface areas of the as-prepared pure CuO, Co<sub>3</sub>O<sub>4</sub> and CuO/Co<sub>3</sub>O<sub>4</sub> composite electrodes. Their BET surface-area are about 114.4 m<sup>2</sup>/g 153.6 m<sup>2</sup>/g and 168.5 m<sup>2</sup>/g, respectively. The pore size distribution curves revealed in Fig. S6 indicate that the pore sizes of CuO catalyst range in 3–12 nm and those of Co<sub>3</sub>O<sub>4</sub> and CuO/Co<sub>3</sub>O<sub>4</sub> catalysts range in 3–16 nm.

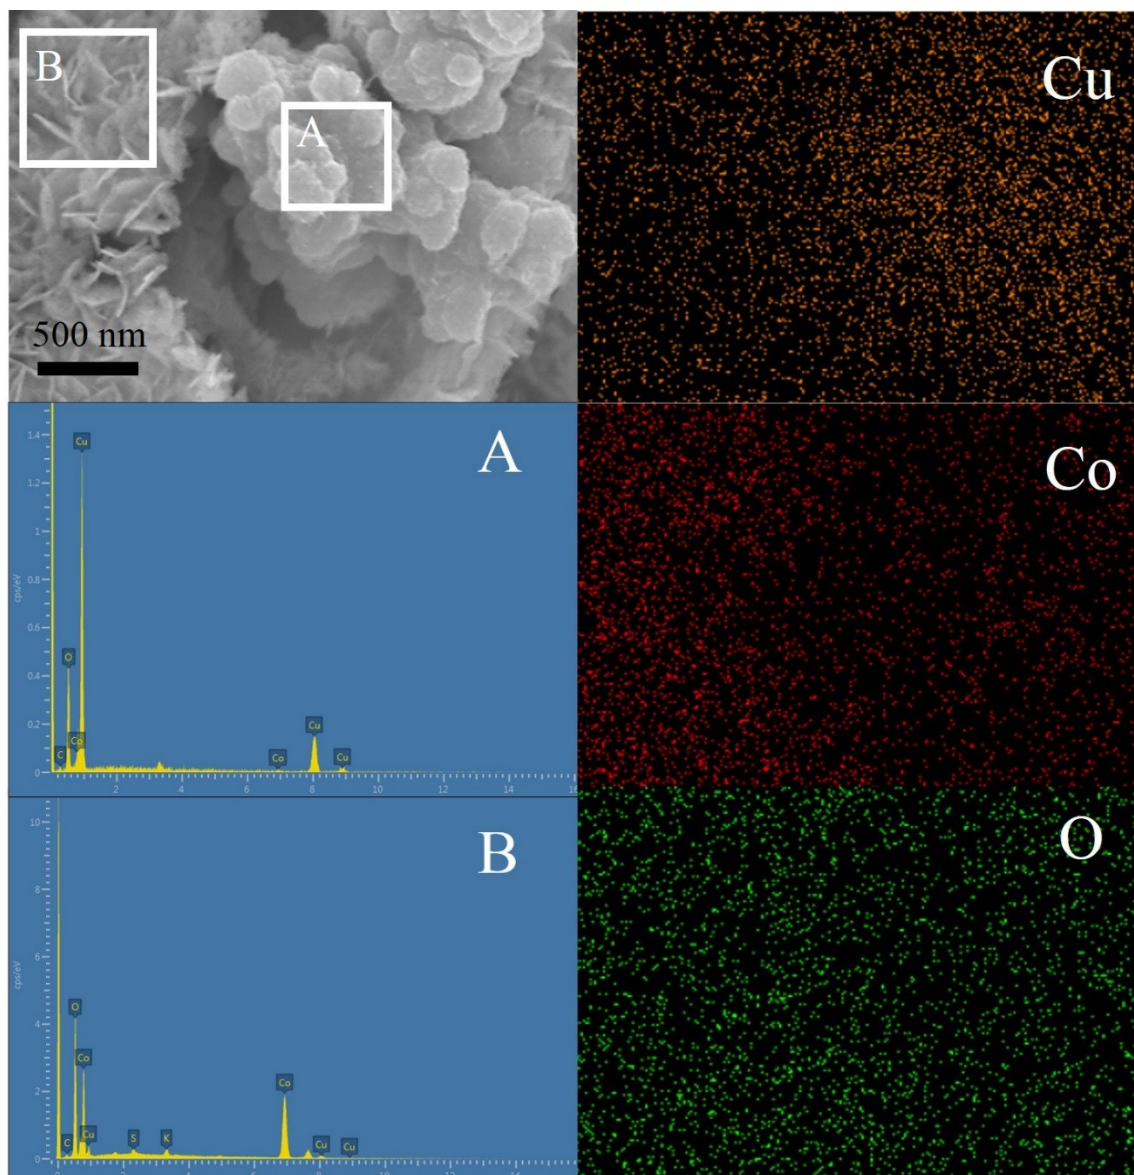

Fig. S7 EDS elemental mapping and spectra of CuO pillar in the core (A) and  $\text{Co}_3\text{O}_4$  nanosheets shell (B), and corresponding SEM image.



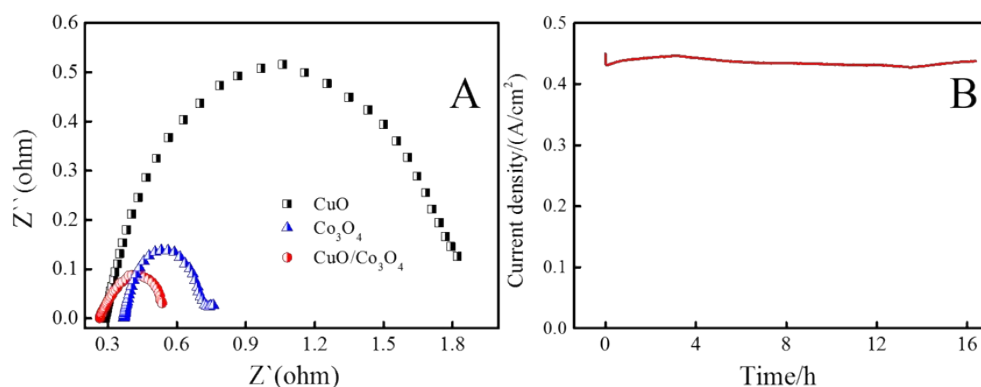

Fig.S8. (A) Nyquist plots of pure CuO (black),  $\text{Co}_3\text{O}_4$  (blue) and CuO/ $\text{Co}_3\text{O}_4$  composite catalyst (red) prepared at -0.8V, overpotential is 0.4V. (B) Time dependence of current density for CuO/ $\text{Co}_3\text{O}_4$  composite catalyst in 1 M KOH electrolytes over 60,000 s.

Fig. S8 A shows the electrochemical impedance spectroscopy (EIS) of CuO/ $\text{Co}_3\text{O}_4$  composite and pure CuO,  $\text{Co}_3\text{O}_4$  electrodes. The values of  $R_{\text{ct}}$  (referred as the charge transfer resistance) can be calculated from the arc radius of the Nyquist plot. Obviously, the CuO/ $\text{Co}_3\text{O}_4$  electrode exhibits the lowest  $R_{\text{ct}}$  of 0.29  $\Omega$ , while the  $R_{\text{ct}}$  of CuO and  $\text{Co}_3\text{O}_4$  are 1.57 and 0.35  $\Omega$  respectively, implying that CuO/ $\text{Co}_3\text{O}_4$  has lower charge transfer resistance through a mutual reinforcement and/or modification of CuO and  $\text{Co}_3\text{O}_4$ . Fig. S8 B shows the durability of CuO/ $\text{Co}_3\text{O}_4$ /CR electrode, the time-dependent current density curve is collected at 1.8 V where the cell shows a high hydrogen evolution rate. One can see that only a slight fluctuation of the current is observed during 16 h, indicating that such a composite electrode is capable of maintaining its catalytic activity for a long time. Therefore, this material has great potential to replace noble metals for hydrogen evolution from water electrolysis.
